# Supplementary material for: Risk assessment of heavy metal toxicity induced by platinum accumulation in tumor patients
Source: PeerJ journal article supplement (doi:10.7717/peerj.19375), 2025-05-12
Supplement: Data.xlsx [file Data.xlsx]

## Sheet: 20241114�����ݿ��ύ��
Group	Number	Age	Gender(1-male,2-female)	Disease classification	Adverse	Platimun level(μg/L)	Surgery(0-No,1-Yes)	Fatigue	Anemia(1-No, 2-Yes)	Leukocyte	Erythrocyte	Hemoglobin	Glutamic-pyruvic transaminase	Cholinesterase	Carbamide	Creatinine	Uric acid	Phosphorus	Cystatin
1	1	59	1	2	0	118.8	1	0	1	5.8	4.935	154.5	39	7541	5.45	79	409	0.94	0.67
1	2	62	1	4	0	251.4	1		1	5.8	4.095	130.1	45	5810	5.91	68	329	0.9	0.85
1	3	48	2	2	1	166	0	0	2	4.2	3.6	92.8	132	5149	3.81	68	256	0.76	0.68
1	4	56	1	4	1	335.9	1		1	4.9	3.885	122.4	40	5755	4.63	77	324	1.11	0.6
1	5	62	1	10	0	166.6	1	0	1	4.7	3.99	120.2	70	5475	5.8	84	357	0.99	0.69
1	6	56	2	4	0	383.9	0	14	1	24.68	4.05	121.3	18	10853	2.14	66	227	1.07	0.77
1	7	75	1	2	0	175.5	0	6	1	6.2	4.305	122.7	18	6365	3.04	57	233	1.07	0.61
1	8	28	1	2	0	293.7	1	0	2	3.87	4.41	103.2	32	5984	2.88	84	344	1.12	0.86
1	9	55	2	10	0	293.2	1	9	1	6.72	3.95	117.2	75	6928	7.02	76	285	1.07	0.82
1	10	62	1	4	0	232.8	1	0	2	3.3	3.57	109.8	18	4256	6.25	83	428	1.18	1
1	11	65	1	4	2	108.2	0		2	3.73	3.65	107.1	14	4834	8.66	155	495	1.19	1.2
1	12	50	2	2	0	113.6	1		2	6.6	5.46	107.9	22	9393	3.83	75	549	1.25	0.97
1	13	47	1	2	0	132.1	1	8	1	7.4	4.41	140.3	23	8043	4.4	88	412	1.16	0.98
1	14	61	2	2	0	286	1	4	1	23.3	4.095	138.3	21	8318	4.37	67	410	1.04	0.84
1	15	72	2	2	0	130.3	0	0	1	5.2	5.775	115.5	23	6779	5.68	61	270	1.14	0.83
1	16	46	1	9	0	93	0	28	2	8.4	3.465	93.7	30	4446	9.17	105	354	0.94	0.96
1	17	47	1	2	0	108.1	1	0	1	6.1	5	155.2	29	8726	5	91	479	0.95	0.89
1	18	66	1	2	0	93.1	1	0	1	3.7	4.2	137.8	29	6821	4.18	70	316	0.8	0.84
1	19	63	1	2	0	144.3	1	2	1	4.81	4.32	125	38	7765	4.16	76	350	0.99	0.78
1	20	75	1	9	0	208.6	0	5	2	6.3	3.465	100.4	40	3891	4.14	75	249	0.93	0.8
1	21	70	1	4	0	221.4	1	7	2	4.2	2.94	101.3	18	3517	5.91	69	238	0.83	0.85
1	22	62	2	2	0	228.8	1	8	1	4.62	3.94	122.8	49	6250	4.26	57	306	0.97	0.87
1	23	65	1	9	0	178.5	0	0	2	3.33	4.39	91.9	15	5183	5.34	72	281	0.89	0.86
1	24	37	1	2	0	161.5	0		1	4.4	4.62	132.1	39	9428	5.09	91	608	0.76	0.88
1	25	57	1	4	0	452.1	0	19	2	7.26	3.48	114.9	15	5531	4.6	79	382	1.05	1.02
1	26	37	1	2	0	214.3	0	10	1	4.78	5.02	144.8	49	10346	4.4	101	581	0.78	0.72
1	27	65	1	9	0	157.5	0	1	2	3.9	3.99	90.2	13	4278	4.07	64	242	0.89	0.7
1	28	69	2	2	0	233.3	1	10	1	5.7	4.515	141.5	59	7466	3.57	52	232	0.92	0.68
1	29	53	1	2	1	174.9	0	0	1	5.75	4.44	133.8	76	5867	4.3	86	288	1	0.83
1	30	64	1	4	0	266.5	1	22	1	4.59	4.12	122.8	16	6473	3.49	82	302	0.87	0.76
1	31	67	1	2	0	284.3	1	0	1	3.4	4.2	135.9	36	7224	5.77	78	412	0.84	0.87
1	32	57	1	2	0	181.9	1	0	1	9.1	4.62	145	50	7109	3.93	78	368	0.86	0.72
1	33	68	1	2	0	132.8	0	9	2	4.23	5.49	100.6	14	6172	5.91	90	486	0.95	0.83
1	34	65	1	9	0	206.9	0	0	2	4.49	3.873	118.9	39	5140	3.34	70	338	1.01	0.75
1	35	57	1	4	0	291.5	0	0	1	6.6	3.675	120.6	97	5113	4.65	82	342	1.09	1.03
1	36	56	1	2	0	244.4	1	0	1	6.55	5.49	129.9	50	8143	3.24	82	401	1.26	0.86
1	37	62	1	4	0	256.3	1	0	1	14.6	3.885	127.5	76	5129	5.91	72	306	1.04	0.87
1	38	51	2	2	0	282.9	0	16	2	5.1	3.6	108.3	24	5395	2.22	57	229	0.93	0.59
1	39	67	1	2	0	182.2	0	1	1	4.32	4.46	145.7	17	7519	6.51	74	486	1.05	0.82
1	40	62	1	10	0	143.8	0	0	2	6.8	5.2	114.6	18	8335	3.3	83	357	0.77	0.75
1	41	67	1	9	0	256.8	0	9	1	6.53	4.6	136.5	46	7964	4.32	65	434	1.03	0.6
1	42	49	2	2	0	211.7	1	0	2	11.52	4.16	106.2	38	9961	4.8	52	243	1.31	0.7
1	43	65	1	2	0	300.4	1	0	2	5	3.675	113.2	45	5597	2.87	45	271	0.84	0.78
1	44	49	2	9	0	169.6	1		1	3.28	4.41	119.2	20	8238	4.79	64	213	1.12	0.63
1	45	74	2	2	0	116.8	1	0	1	5.7	4.2	122	20	5836	4.94	59	197	1.08	0.78
1	46	45	2	2	1	424.4	1	10	1	5.1	4.515	125.8	38	7579	3.83	59	353	1.2	0.73
1	47	70	1	9	0	159.8	1	0	1	4.9	4.725	134.2	17	5664	4.59	84	236	1.32	0.79
1	48	58	1	7	0	201.6	0		1	3.9	3.675	126.1	17	5637	3.24	80	314	1.2	0.8
1	49	71	1	2	0	151.6	1	7	1	3.68	5.04	139.7	11	5813	3.66	91	352	1.18	0.83
1	50	64	1	2	0	256.1	0	7	1	4.52	4.76	135.2	25	5143	4.39	98	282	1.18	0.82
1	51	69	1	2	0	211.3	0	7	2	8.06	4.49	105.8	39	4772	4.33	98	379	0.98	0.7
1	52	36	1	2	0	172.8	1	0	1	4.8	5.88	145.3	69	9283	2.63	77	416	1.12	0.61
1	53	69	1	4	1	232.4	1		1	4.81	4.57	129.3	20	5523	3.3	89	352	1.23	0.65
1	54	71	1	2	0	299.8	1	22	1	3.2	5.04	147.6	16	5769	2.63	91	336	1.25	0.87
1	55	68	1	4	0	164	0	9	2	4.1	3.885	87.3	18	4433	3.6	107	298	0.95	1.05
1	56	69	1	4	1	237.9	1		1	3.3	4.515	132.4	17	5107	4.28	86	355	1.31	0.79
1	57	44	2	9	0	295.9	1		2	3.6	3.78	102.2	7	3566	4.99	62	209	1.2	0.61
1	58	36	1	2	0	196.7	1	0	1	6.2	5.985	149.9	72	9380	3.43	67	372	0.93	0.61
1	59	76	1	4	0	268.1	1		2	22.1	4.2	110.7	16	3982	4.06	84	351	0.82	0.91
1	60	52	1	4	0	156.7	0	0	2	6.6	5.355	117.8	20	7073	5.54	86	378	1.15	0.95
1	61	59	1	4	0	262.1	1		1	3.9	4.41	124.6	24	6310	5.38	80	408	0.94	0.59
1	62	69	1	2	0	292.1	0	2	2	6.9	4.305	106.7	46	4388	4.75	88	324	0.92	0.97
1	63	50	1	2	0	152.7	1	0	1	3.9	4.62	132.6	68	7521	5.12	77	431	1.03	0.75
1	64	28	2	2	0	123.5	1	0	1	3.4	3.885	121	16	7808	3.26	55	297	0.96	0.81
1	65	66	1	2	0	181.2	1	13	2	4.65	3.82	96.1	28	4910	5.97	90	437	1.29	0.88
1	66	49	2	2	0	236	1	0	2	3.8	3.675	106.5	33	9657	3.57	56	247	0.97	0.88
1	67	75	1	9	0	200.8	0	14	1	5.3	3.675	123.8	17	5334	3.65	81	273	1.2	0.89
1	68	54	2	2	1	246.5	0	1	1	4.1	4.2	114.7	25	7008	3.95	61	367	1.43	0.75
1	69	71	1	4	0	158.9	0	2	1	6.37	4.42	126.9	13	6164	5.25	77	286	1.25	0.81
1	70	67	2	2	0	463.1	1	22	2	4.2	3.885	109.3	11	6207	4.32	60	364	1.2	0.99
1	71	55	2	9	0	216.1	1	0	2	4.3	4.39	101.4	20	6730	4.47	57	217	1.22	0.8
1	72	62	2	2	0	260.7	1	10	1	3.36	4.48	131.2	41	8021	3.3	64	346	1.14	0.85
1	73	60	2	2	2	496.7	0	22	1	4.74	4.01	126.5	86	4774	4.22	81	263	1.39	0.72
1	74	61	1	2	0	447.3	0	14	2	3.9	4.6	110.6	11	6231	8.5	116	415	1.3	1.22
1	75	64	1	2	0	246.5	1	9	1	4.56	3.944	127.2	15	7371	3.75	86	201	1.03	0.87
1	76	55	1	2	0	400.8	1	10	1	3.9	3.885	136.5	57	6276	3.7	101	370	1.28	0.98
1	77	49	2	9	0	360.3	1	19	1	3.3	3.885	116.4
1	78	47	2	2	1	189	0	25	2	5.6	2.835	100.4	33	5584	2.23	69	295	1.25	0.62
1	79	53	1	9	0	161.6	1	19	2	4.1	3.885	105.1	16	4869	6.89	75	329	0.97	0.66
1	80	67	2	2	1	768.2	1	15	2	4.04	3.78	106.4	17	6262	4.75	70	370	1.38	0.7
1	81	60	1	2	0	156.5	0	2	1	5.1	3.99	123.8	18	4556	5.27	97	327	1.25	0.82
1	82	74	1	4	0	191.5	1	0	2	3.3	3.045	107.2	46	6242	9.13	93	263	1.46	0.87
1	83	69	1	4	0	161.1	0	8	2	5.4	3.51	111	18	5694	3.68	96	425	1.16	0.91
1	84	60	1	2	0	240.4	0	7	1	3.71	5.14	148.3	24	6843	6.27	100	381	1.02	0.99
1	85	70	1	9	0	318.5	1	0	1	6.43	3.56	121.4	26	4991	3.82	72	263	1.45	0.85
1	86	64	1	2	0	215.6	0	1	1	5.6	3.885	130.2	24	5374	3.17	77	362	0.8	0.73
1	87	55	2	2	0	160.8	1	7	1	4.63	4.38	128.4	21	6793	3.25	62	245	1.35	0.85
1	88	60	1	4	0	315.1	1	9	2	15.68	3.48	87.1	26	5307	4.6	143	370	1.34	1.26
1	89	68	1	7	0	76.2	0	3	1	5.83	4.01	122.6	19	5624	5.2	77	353	1	0.99
2	90	26	2	1	0	278.9	0	9	1	4.8	4.515	111.6	47	7373	3.1	48	297	1.27	0.61
2	91	55	2	1	0	171.5	0		1	7.7	3.9	112.9	27	7155	3.43	75	321	1.18	0.99
2	92	45	2	6	1	728.1	1		2	4.8	3.465	103.6	31	6808	5.59	64	264	1.13	0.63
2	93	37	2	6	0	240	1		1	3.3	4.095	110.2	41	10152	3.92	65	398	1.18	0.83
2	94	60	1	8	0	469.6	0	0	2	7.56	2.9	79.1	22	3691	6.57	84	460	1.02	0.87
2	95	64	1	10	0	292.8	0		1	6.7	3.9	120.7	17	9585	6.27	66	298	0.45	0.83
2	96	50	2	6	0	386.7	1		1	6.22	3.97	119.3	20	8052	4.26	70	284	1.43	0.8
2	97	55	1	8	0	367.1	0	21	2	4.6	3.255	97.8	35	8546	5.94	87	403	1.11	0.72
2	98	65	1	8	1	285.2	0	0	2	4.3	4.02	114.6	29	6569	4.67	83	389	1.1	0.87
2	99	60	1	1	2	732.8	0	7	2	5.5	3.675	114.2	15	6898	3.51	87	360	1.21	1.03
2	100	55	2	10	1	159	1		2	4.56	3.79	106.6	11	8212	5.55	62	280	0.91	0.82
2	101	63	1	8	0	339.1	0	0	1	4.8	3.99	122.5	22	7704	7.27	84	414	1.22	0.89
2	102	64	2	6	1	354.1	0	21	2	7.97	2.28	75.1	17	5237	3.78	84	337	0.48	0.86
2	103	61	1	8	1	491.4	0		1	13.2	4.41	123.7	14	8319	3.45	89	404	1.25	0.96
2	104	42	1	1	0	417.2	0	2	1	13.5	4.9	139.4	15	6368	2.77	68	355	1.17	0.82
2	105	48	2	7	2	196.7	0	2	2	11.9	3.885	95.3	29	6480	3.22	62	318	1.53	0.77
2	106	54	2	10	1	759	0		2	10	3.255	93.5	14	3991	3.23	76	361	1.13	0.83
2	107	64	2	6	1	408.5	1		2	3.8	2.8	86	20	6138	4.43	80	441	1.1	0.97
2	108	60	1	8	0	283.8	0	18	2	7.2	3.57	104.6	24	4812	4.09	88	284	0.97	0.98
2	109	50	1	7	0	375.1	1	13	2	3.9	3.255	97.2	24	6690	4.64	106	386	1.15	1.01
2	110	53	1	10	0	436.2	0	0	2	4	4.095	117.4	20	7495	3.87	93	488	1	0.87
2	111	62	1	8	1	538.2	0		2	7.61	3.42	102.9	22	6521	5.5	92	522	1.06	1.14
2	112	63	1	1	1	368.9	0		2	5.84	4.23	119.4	12	5421	6.27	88	273	0.99	0.9
2	113	57	1	7	0	433	1	22	2	8.45	3.19	98.6	58	6052	8.76	93	421	1.53	0.91
2	114	46	2	6	2	520.9	1		1	4.93	4.01	117.4	16	7544	2.68	88	439	1.27	0.89
2	115	43	1	8	1	942.8	0	0	1	5.21	5.21	147.9	21	10084	4.19	82	389	0.97	0.82
2	116	68	2	5	0	407.8	0	0	1	26.8	3.57	116.9	12	6611	5.74	68	403	1.08	0.85
2	117	40	2	6	1	369.7	1		1	5.82	4.05	119.6	13	7299	5.21	89	436	1.21	0.89
2	118	70	2	5	2	645.4	1	16	2	4.73	3.73	100.2	17	6946	4.78	87	329	1.32	0.81
2	119	48	2	6	0	435	1		1	14.4	3.78	111.6	13	7934	4.71	67	326	1.09	0.75
2	120	76	1	8	1	675.7	0	2	2	5.4	3.99	119.7	25	6667	6.97	118	497	1.05	0.83
2	121	57	1	10	0	361	0	3	1	3.8	4.17	129.8	21	6036	5.26	78	353	1.12	0.7
2	122	61	2	5	1	452.8	1	9	1	6.9	3.885	111.6	15	10607	4.18	78	432	0.92	0.7
2	123	51	1	8	0	305.8	0		2	3.8	4.305	109.5	16	5715	5.29	74	323	0.88	0.86
2	124	73	1	1	0	401	0		2	3.76	4.09	118.7	16	6817	5.7	103	321	0.66	0.99
2	125	33	2	5	1	710.2	0	0	1	3.7	4.095	113.7	15	8036	3.48	70	399	0.9	0.72
2	126	55	1	1	0	221.7	0	0	2	3.65	4.25	119.6	18	6601	5.84	80	408	1.11	0.84
2	127	52	2	5	2	534.8	1		2	6.78	3.72	107.8	16	7646	4.21	65	393	0.8	0.68
2	128	37	1	10	0	367.9	0	9	1	8.57	4.14	124.6	20	6738	2.79	93	415	1.17	0.76
2	129	58	2	10	2	443	0	0	2	3.6	3.36	100.4	20	8599	4.6	76	488	0.94	0.81
2	130	49	2	10	2	535.7	0	17	1	3.7	3.8	124.1	18	8077	5.08	73	407	1.11	0.74
2	131	63	1	7	0	379.4	1		2	5.77	4.68	118.3	38	5893	4.75	81	363	1.24	0.73
2	132	53	2	10	2	699.8	1		2	6.27	3.56	102.8	21	7961	6.52	79	479	1.22	0.73
2	133	68	1	8	0	234.9	0		1	6.62	4.86	120.3	32	7165	5.03	81	381	1.1	0.72
2	134	65	1	7	0	451.7	0		2	3.42	3.73	116.4	21	5570	5.24	72	378	0.75	0.73
2	135	68	2	5	0	435.5	0	1	1	3.4	3.465	116.7	13	7250	5.99	81	407	1.1	0.84
2	136	65	1	10	0	537.5	0	24	2	7.4	3.037	86.7	12	4875	3.36	95	214	0.98	0.95
2	137	50	2	7	0	469.6	1		2	7.63	5.13	97.1	24	6059	2.79	53	281	1.16	0.88
2	138	66	1	8	2	809	0	9	2	6.54	3.9	113.8	29	7625	7.46	99	566	1.03	1.04
2	139	59	2	1	1	633.8	0	0	1	16.4	4.62	125.4	28	10328	4.44	67	175	1.13	0
2	140	57	1	10	0	372.5	0	0	2	3.76	3.36	107.6	17	6311	3.36	81	391	1.18	0.86
2	141	69	1	8	2	643.8	1		2	38.95	3.82	113.8	19	6659	3.14	80	414	1.27	0.79
2	142	55	1	10	2	1153	0	8	2	4.3	3.045	101.6	31	7806	3.64	103	364	1.25	1.05
2	143	48	2	5	0	418.8	1	7	1	4.56	3.86	114.1	14	8283	3.08	57	320	1.23	0.59
2	144	60	1	8	0	207.5	0	9	2	5.5	2.835	100	11	6725	5.99	73	286	1.18	0.8
2	145	42	1	1	1	254.9	0	11	2	3.5	2.94	91.1	25	2968	1.75	57	126	0.96	0.48
2	146	59	2	5	1	409.2	1	18	1	5.8	3.885	111.4	24	8941	5.04	83	380	1.06	0.69
2	147	58	2	6	1	400.4	0		1	4.88	4.37	126.3	17	7979	4.25	76	211	0.96	0.65
2	148	42	2	1	1	201	0		1	5.7	4.19	120.9	28	6758	4.27	106	474	0.96	0.75
2	149	58	2	5	0	319.4	0	17	1	4.1	3.64	115.4	31	9073	3.76	72	324	1.21	0.62
2	150	53	2	6	1	484.3	1	12	1	7.8	3.885	116	12	7180	3.03	75	277	1.32	0.89
2	151	62	2	7	0	885.4	1		2	4.4	3.36	96.7	17	6285	2.66	66	241	1.29	0.86
2	152	60	1	7	0	436.8	1		2	4.9	4.2	116.5	34	5594	7.21	86	383	1.31	0.8
2	153	41	2	6	2	478.4	0	9	2	6.18	3.52	102.1	14	5813	5.91	101	352	1.36	1.03
2	154	42	1	1	1	439.4	0	0	2	4.2	3.78	110.1	26	6561	2.99	97	489	0.98	0.83
2	155	46	1	1	0	344.4	0	22	1	7.42	4.84	139.7	27	6665	4.71	90	328	1	0.84
2	156	50	2	10	1	429.3	1	9	1	8	3.99	122.3	22	8171	4.82	70	238	1.11	0.74
2	157	53	1	1	0	587.2	0		2	27.25	4.68	103	29	7050	1.47	79	266	0.78	0.86
2	158	50	1	7	0	465.1	0	0	2	6.27	3.573	117.5	17	4996	4.59	79	414	1.14	0.97
2	159	66	2	5	0	370.7	0	0	1	5.3	4.725	134.1	26	6986	5.38	63	332	1.05	0.93
2	160	62	1	1	1	604.7	0		2	5.3	3.885	119.5	14	7118	3.85	99	305	1.19	1.12
2	161	72	2	7	2	540.8	0	21	1	6.5	3.4	115
2	162	55	2	6	0	317.8	1		1	5.6	4.47	120.2	31	9556	4.41	86	434	1.33	0.78
2	163	51	2	6	0	364.8	1		1	5.36	4.42	120.4	37	7122	4.05	67	287	1.39	0.93
2	164	69	1	8	0	748.8	0	12	1	5	4.4	123.4	15	7758	3.75	91	365	0.99	0.87
2	165	58	2	10	2	675.2	1		1	5.1	3.82	113.4	19	9765	4.92	77	330	1.39	0.7
2	166	66	1	8	1	341.6	0	12	2	9.7	4.515	103.9	72	5292	3.62	87	145	1.3	0.8
2	167	61	1	7	0	486.2	0	18	2	6.35	3.58	108.6	32	7636	8.99	92	451	1.66	0.85
2	168	41	2	6	2	438.4	1		2	5.02	3.345	107.1	15	7712	7.18	90	444	1.64	0.83
2	169	64	1	8	0	537.3	0	0	2	2.86	3.72	116.1	19	7321	5.44	108	473	1.34	0.79
2	170	39	2	8	0	272.4	0	3	1	6.1	3.57	120.1	42	6552	3.08	54	245	1.59	0.78
2	171	56	2	6	2	1070.2	0	12	2	22.1	2.94	92.1	12	6556	4.74	67	232	1.2	0.62
2	172	67	2	10	2	244.5	1		2	2.6	3.78	109	12	5879	8.6	112	360	1.16	1.01
2	173	59	2	5	2	828	1	19	2	5.2	3.045	96.7	18	7952	7.34	89	407	1.23	0.62
2	174	66	1	1	0	353.9	0	13	2	2.1	3.465	104.9	14	5777	5.28	80	372	0.92	0.9
2	175	54	1	1	0	242.9	0	19	2	5.32	3.65	103.4	11	6839	3.1	80	378	1.13	0.9
2	176	61	1	8	2	578.8	1		1	6.5	3.99	131.7	21	7568	4.23	110	303	1.24	1
2	177	50	1	1	0	358.6	0	10	1	4.3	3.885	122	17	8404	5.04	81	275	1.21	0.65
2	178	53	1	7	0	230.3	0		1	11.13	4.56	140.9	18	6375	4.92	90	293	1.12	1.04
2	179	66	1	10	0	301.1	0	9	1	4.2	3.78	121.5	14	6526	3	74	314	1.3	0.74
2	180	51	2	6	3	1583.2	1		2	3.99	3.56	105.6	17	6756	3.62	69	366	1.38	0.73
2	181	54	2	5	2	558.2	0		1	8.96	4.14	116	39	8814	2.16	62	344	1.26	0.8
2	182	46	1	8	2	788.4	0	13	1	4.54	4.9	143.6	15	8166	3.43	101	403	1.14	1.1
2	183	55	2	6	0	252.7	0	9	1	3.28	3.42	123.8	17	6717	4.03	72	312	1.27	0.78
2	184	52	1	7	0	158.1	0		2	4.02	3.57	105.9	15	5780	3.55	83	339	1.18	0.88
2	185	58	1	1	0	477.6	0	14	1	9.93	4.29	129.6	14	6712	4.77	72	284	1.34	0.91
2	186	73	1	9	2	358.4	0	7	2	6.77	3.66	100.1	16	5308	4.07	102	251	0.78	0.92
3	349	34	2	8	0	381.3	1	18	2	4.25	4.18	106	52	9868	5.74	70	311	1.2	0.65
3	350	64	2	8	0	88.48	0	0	1	5.78	4.85	129.4	27	8201	3.47	71	324	1.06	0.74
3	351	51	1	8	3	328.5	0	14	2	3.73	3.98	115.7	18	6451	4.78	83	280	1.22	0.69
3	352	76	2	10	0	64.29	1		1	5.7	4.2	128	43	5482	5.59	71	466	0.77	0.68
3	353	63	2	11	1	327	0	1	2	5.3	3.675	102.1	13	6289	5.1	53	407	1.17	0.82
3	355	52	2	6	0	249.2	1						23	8250	5.87	78	275	1.15	0.64
3	356	65	2	6	1	225.7	1		1	6.9	4.305	120.8	26	6985	5.99	68	274	0.98	0.84
3	357	47	2	11	0	431.4	1		2	5.8	4.095	109.7	32	9373	6.68	68	490	0.98	1.01
3	358	60	2	11	0	265.4	1		1	5.9	3.885	123.6	47	7152	8.97	84	396	1.28	0.93
3	359	61	2	10	0	228.5	1	0	1	5.5	3.99	111.4	20	8999	5.17	60	870	0.87	0.73
3	360	64	2	11	0	249.1	1		2	5	3.57	104	20	7713	7.49	76	281	1.03	0.86
3	361	43	2	11	0	510.8	1		2	3.2	3.885	107.7	18	10225	4.32	64	305	1.11	0.71
3	362	55	2	11	0	185.2	1		1	3.67	4.37	118.3	25	7167	4.97	70	255	1.22	0.8
3	363	64	2	11	2	719.9	0	0	1	4.42	4.15	118.3	21	6992	4.4	88	452	0.91	0.79
3	365	52	2	6	0	317.1	1		2	2.87	4.59	105.2	43	8623	6.72	80	508	1.09	0.8
3	366	62	2	1	0	269.6	0	5	2	4.7	3.61	106.3	22	7181	2.31	61	264	0.98	0.72
3	367	55	2	11	0	357.8	1		2	3.6	3.36	107.3	19	7189	7.13	75	467	1.04	0.83
3	368	55	2	6	0	443.5	0	10	2	2.99	2.18	67.4	16	7384	4.38	75	350	1.34	0.76
3	369	34	2	8	0	315.6	1	0	1	6.1	4.305	113.6	67	10929	2.54	62	348	1.12	0.81
3	370	63	1	8	0	70.57	0	9	1	7.12	4.79	134.5	13	7170	8.25	92	568	0.78	1.14
3	371	52	1	8	0	160.6	0	0	1	7.1	4.83	136	204	8617	4.15	64	334	1.12	0.82
3	372	63	2	11	2	232	0	8	2	5.3	3.57	101.7	12	7076	4.89	54	398	0.89	0.61
3	373	60	2	9	0	189.5	0	0	1	6.04	4	110.7	19	8959	5.27	68	364	0.72	0.93
3	374	27	2	8	0	156.1	0	1	1	5.72	5.47	117.3	29	6797	4.87	57	210	0.69	0.71
3	376	66	2	6	0	178.7	1		2	4.6	2.94	88.3	17	5755	7.71	114	394	1.14	1.35
3	377	64	1	8	0	173.7	0		1	10.07	4.77	128	23	6999	3.28	51	249	0.81	0.73
3	380	64	2	11	0	188.2	1	0	1	4.72	3.71	111.1	13	9748	5.71	81	478	1.06	0.78
3	381	51	2	11	0	216.7	1		2	5.1	3.4	104.9	29	9157	3.51	62	351	1.06	0.8
3	382	24	2	11	0	270.9	1		2	7.3	3.99	103	20	6311	5.03	74	263	1.38	0.8
3	383	53	2	11	0	82.33	1		2	3.9	3.5	107.5	24	5410	5.82	72	285	1.13	0.93
3	384	56	2	8	0	133.5	0	18	1	6.4	4.515	124.6	22	7565	3	72	388	1.21	0.8
3	385	49	2	8	0	402.7	0	9	1	3.5	5.67	114.2	9	7515	2.98	65	359	1.18	0.78
3	386	43	2	9	0	285.8	1	21	2	4.9	3.675	100.6	24	9032	4.33	58	258	1.34	0.74
3	387	68	1	8	1	94.75	0	1	1	6.5	4.41	129.6	30	6103	8.1	127	353	0.87	0.94
3	388	26	1		0	144.5	0	0	1	5.33	4.87	135	57	5265	4.89	79	539	0.69	0.79
3	389	54	2		0	166.9	1		1	7.1	3.99	120.5	40	8655	4.73	74	380	0.89	0.84
3	390	61	2		0	244.3	1	24	2	4.7	3.78	106.1	16	7438	5.32	67	487	1.09	0.9
3	392	42	2	5	0	314.6	1		1	5	3.81	119.5	48	10113	3.45	70	273	1.12	0.78
3	393	60	1	8	0	85.93	0		2	5.2	3.57	93.3	12	4707	2.2	52	209	1.06	0.85
3	394	69	1	8	0	165.8	0	0	2	8.41	3.05	84.9	22	5002	2.16	64	247	1.02	0.87
3	396	64	2	11	0	323.6	0	0	1	4.36	4.51	126	25	7901	4.64	86	409	0.89	0.91
3	398	25	2	11	0	368.7	1		2	5.67	4.49	102.7	17	7243	5.77	63	281	1.05	0.76
3	399	55	2	11	1	277.8	1		1	3.68	4.21	117.9	26	7409	3.44	64	376	1.14	0.82
3	400	69	2	5	1	170.6	0	4	2	2.99	3.69	109.5	20	8642	6.45	80	308	0.75	0.89
3	401	55	2	6	0	285.2	1		2	5.7	3.465	100.9	20	6198	2.71	66	303	0.62	0.99
3	402	64	2	9	1	284.8	0	7	2	8	3.675	106.7	30	6328	3.18	88	229	1.36	1.06
3	403	53	2	6	2	365.9	1		1	5.45	4.49	123.3	27	8435	3.6	55	269	1.09	0.8
3	404	66	2	10	0	211.3	0	0	2	7.3	3.4	96.8	28	8513	4.57	74	356	1.35	0.94
3	405	42	2	5	1	177.8	1		1	3.32	4.54	116	69	6792	4.89	70	256	1	0.8
3	406	42	2	5	2	323.3	1	14	1	3.6	4.2	117.1	36	7320	3.63	76	329	0.87	0.7
3	407	62	2	5	4	331	1	8	2	5.7	3.045	93.7	58	2075	5.56	50	206	0.3	0.76
3	408	61	1	8	1	90.53	0	2	1	5.7	5	132.8	38	4971	1.59	71	216	1.18	0.91
3	409	63	1	8	0	94.78	0	0	1	3.8	3.885	120.5	22	7000	7.39	90	461	0.97	0.89
3	410	72	1	8	0	127.6	0	0	1	6.7	4.41	122.4	17	6431	5.63	98	378	0.99	0.76
3	411	53	2	6	0	266.2	1	14	1	3.9	4.2	123.7	29	8455	3.63	53	260	1	0.67
3	412	76	2	11	0	198.7	0		1	3.9	3.99	117.5	18	5704	4.39	62	328	1.08	0.95
3	413	60	1	8	0	216.8	0	10	2	4.91	3.14	84.4	17	5734	2.83	55	277	1.01	0.73
3	414	66	2	6	0	53.86	0	2	2	2.4	2.205	66.4	13	4574	7.11	53	305	0.85	2.17
3	415	51	1	1	0	234.8	0	7	1	2.8	4.095	125.2	34	10236	3.78	85	271	1.03	0.87
3	416	66	1	8	1	114.6	0	0	1	6.3	5.67	134.7	56	8135	3.27	81	333	0.8	0.87
3	417	30	2	5	3	129.9	0	0	1	3.9	4.095	113.4	235	7230	5.23	58	314	1.21	0.69
3	418	68	1	8	1	272.4	0	1	2	2.7	3.57	116.3	31	6964	5.4	107	344	0.33	0.95
3	419	56	2	6	0	174.9	1		1	5.98	4.11	117.1	32	7344	4.27	60	374	1.27	0.75
3	420	66	2	10	0	245.8	0	0	2	8.9	3.465	97.1	22	8954	4.44	72	295	1.27	0.87
3	421	63	1	8	2	316.8	0	19	2	2.6	3.465	107.4
3	422	52	2	6	0	261.5	1		1	2.5	3.8	113.1	41	8377	3.27	67	481	1.34	0.74
3	423	65	2	6	0	168.4	0		1	5.09	3.698	118.3	17	5593	2.62	65	196	0.89	0.62
3	424	69	1	8	1	84.89	0	3	1	5.2	3.99	124.8	28	6622	7.14	61	459	1.04	0.74
3	425	56	2	10	3	197.3	0	3	2	3.44	3.54	103.7	21	9723	3.66	66	408	0.96	0.74
3	426	67	2	7	1	176.1	0	12	1	7.6	3.675	111.2	17	7977	2.92	97	391	0.99	0.79
3	428	64	2	11	0	105.3	1		2	3.6	3.15	88	24	5634	2.53	52	314	0.92	0.64
3	429	54	2	11	0	309.9	0		1	4.69	4.39	117.8	24	7218	6.65	78	305	0.94	0.79
3	430	50	2	8	0	119.1	0	9	1	7.26	4.12	123.5	23	9197	5.06	52	301	0.92	0.62
3	431	52	2	5	3	286.2	0	9	1	4.97	4.12	119.1	27	9084	4.11	52	496	1.2	0.84
3	432	66	1	8	1	281.7	0	9	2	4.6	4.095	95.1	20	7923	2.94	80	337	0.93	0.89
3	433	66	2	10	0	235.4	0	9	2	3.57	2.72	81.1	21	8505	4.73	75	333	1.4	0.87
3	434	42	2	5	2	380.6	0	0	1	3.65	4.38	115	23	7599	4.05	73	262	1.39	0.78
3	435	61	2	5	0	237.1	0	0	2	5.61	3.76	105	17	8589	3.13	60	290	1.33	0.63
3	437	59	1	7	1	269.9	0	4	2	5.8	3.36	107.9	22	7718	4.34	119	452	1.14	0.84
3	438	47	1	1	0	346.1	0	9	2	2.6	3.15	108.1	10	6121	2.26	79	305	0.93	0.74
3	439	67	2	6	1	385.9	1		2	4.04	3.27	103	26	7433	5.24	81	260	1.03	0.81
3	440	60	2	6	0	207.9	1		1	4.7	4.41	128.6	35	10557	5.37	63	478	0.99	0.69
3	441	63	2	5	0	218.1	0	3	2	2.2	4.83	109	17	7551	4.55	67	287	1.07	0.68
3	442	64	1	8	0	98.52	0	9	2	6.3	3.675	107.5	11	5434	2.92	73	359	0.77	0.69
3	443	62	1	10	1	84.59	1	6	2	8.1	3.885	118.3	13	5832	3.61	97	347	0.74	0.78
3	444	68	2	6	1	164.2	1		1	5.97	3.8	114.8	28	8185	6.63	72	323	1.18	0.86
3	446	62	1	10	1	201.6	1	9	2	6.77	3.8	113.7	15	6061	2.91	98	385	1.04	0.6
3	447	67	2	10	1	83.3	1	1	1	4.5	4.095	129.2	50	7529	5.29	67	438	1.11	1.05
3	448	63	2	5	0	314.3	0	2	2	2.9	4.83	107.9	20	7467	4.19	69	286	1.06	0.82
3	449	56	2	6	1	180.6	1		2	4.7	3.045	89.2	13	7343	3.43	73	436	1.24	0.76
3	450	54	2	5	0	274	0	13	1	4.64	4.74	125	18	8680	3.69	76	441	1.09	0.61
3	451	71	1	8	1	124	0	9	2	3.2	4.095	112.2	21	5804	5.83	111	391	1.19	1.03
3	452	70	1	8	0	159.9	0	5	2	6.1	3.675	115.9	29	7374	5.08	72	371	0.98	0.67
3	453	64	2	6	1	133.5	1	0	1	8.3	4.2	117	8	8063	1.8	62	245	0.98	0.72
3	454	68	2	7	1	386.1	0	9	2	4.8	2.415	78.4	15	7986	2.61	97	387	1.04	0.88
3	455	60	2	6	0	178.5	1		1	4.8	4.2	120.7	41	10622	4.25	59	449	0.96	0.8
3	456	62	2	5	0	272.2	0	2	2	4.5	3.465	99.9	21	8070	2.88	58	268	0.8	0.7
3	457	68	2	6	0	172.5	1		1	4.07	3.6	111.7	26	8488	4.8	62	311	1.19	1.03
3	458	51	1	8	0	205.7	0	10	2	3.7	2.31	69	15	3210	2.46	64	166	0.88	0.65
3	459	47	1	8	0	175	0	0	1	7.9	5.145	141	27	7988	6.6	90	371	1.01	0.69
3	460	48	2	10	1	344.5	1	13	2	3.1	2.31	73.4	15	8852	2.84	67	285	1.1	0.7
3	461	38	2	11	0	73.18	1		2	6.8	3.57	100.4	16	5648	3.32	63	331	1.29	0.73
3	462	73	2	11	1	201.6	1		2	16.5	3.465	101.1	23	4988	4.18	59	190	1.26	0.66
3	463	53	2	11	0	533.1	1		2	3.44	2.82	89.9	14	8265	5.3	62	261	1.14	0.63
3	465	67	2	8	1	294.7	0	9	2	6.6	3.045	78.1	17	7183	2.86	83	349	0.89	0.87
3	466	59	1	8	1	205	0	0	2	4.5	3.885	120	31	6109	6.43	77	450	1.33	0.92
3	467	55	2	6	0	379.7	1		1	3.3	4.2	120.2	22	6112	3.24	61	283	1.21	0.86
3	468	51	2	11	1	157.8	1	13	2	3.58	3.31	104.1	35	7233	4.62	60	311	1.77	0.98
3	469	50	2	11	0	360.1	1		1	3.45	4.53	120.2	25	8650	4.57	62	347	1.1	0.79
3	470	40	2	11	2	250.6	1		1	11.53	4.32	115.2	45	9812	5.21	67	372	1.34	0.8
3	471	60	2	8	1	133.5	0	9	1	4.5	4.3	132.8	16	5562	3.46	71	189	1.21	0.83
3	472	66	1	8	0	108.9	0	9	2	11.68	3.97	95.8	27	5546	5.21	107	342	1.26	1.47
3	473	51	2	5	0	304.9	0	3	2	3.91	3.59	108.5	78	10246	5.1	73	426	1.19	0.74
3	478	57	2	11	0	231.8	0	8	2	3.8	4.095	98.7	14	6000	5.1	50	173	0.98	0.72
3	479	54	2	11	0	70.83	1		1	8	4.2	115.5	15	8834	2.19	66	346	1.28	0.78
3	480	33	2	6	0	340.6	1		1	3.4	4.095	115.5	17	5547	3.3	79	423	1.53	0.86
3	481	59	2	6	0	251.1	0		2	6.1	3.99	99.6	17	8202	3.42	91	348	1.37	0.95
3	482	62	1	8	1	39.41	0	9	1	7.22	4.56	130.4	41	3346	9.64	80	251	1.2	0.88
3	483	54	2	11	0	153.8	1	13	1	4.6	4.2	118.3	15	7912	5.03	69	320	0.99	0.84
3	484	54	1	8	1	90.21	0	7	1	5.56	4.97	136.2	20	10327	3.05	93	400	1.25	0.79
3	485	52	1	8	0	108.8	0	4	2	5.9	3.78	102	23	5404	2.7	72	452	1.42	0.91
3	486	58	2	6	0	199.3	1		2	5.99	3.63	104.8	20	7927	4.98	76	286	0.93	0.73
3	487	41	2	5	0	136.7	0	4					23	7205	4.15	74	336	1.1	0.81
3	488	53	2	5	1	192.3	0	9	1	2.29	3.44	112	19	9670	3.95	54	350	1.44	0.6
3	489	51	2	5	0	368.2	1	3	2	3.45	2.84	92.1	20	6981	3.2	63	354	1.69	0.71
3	490	75	2	8	1	61.03	0	2	1	11.75	4.42	128.7	15	3110	4.07	52	198	0.97	0.72
3	491	67	2	11	0	104.9	1		1	7.57	4.4	129.4	19	8953	6.13	58	427	1.23	0.63
1	493	67	1	2	0	147.1	1	9	1	5.2	4.305	131.7	39	6933	5.31	75	433	1.04	0.95
1	494	58	2	3	1	38.83	0	29	2	10	3.885	89.9	10	4876	3.4	68	140	1.2	1
1	495	48	1	3	1	61.69	0	28	1	12.61	5.06	143.1	66	9366	3.94	88	463	0.8	0.9
1	497	75	1	10	0	69.15	0	0					58	4593
2	499	58	1	8	0	142.3	1	0	1	4.45	5.1	133	21	8064	5.62	55	286	0.9	0.66
2	500	72	1	7	1	262.3	1	0	2	7.07	3.79	111.8	78	6206	7.1	79	263	0.92	0.98
2	501	32	2	6	1	244	1		2	3.7	3.675	103.4	22	5731	2.77	62	317	1.15	0.88
2	502	66	2	11	0	136.7	1		2	6.3	3.36	90.4	15	7503	3.19	44	209	1	0.84
2	503	61	1	1	1	207.8	0		2	3.7	4.305	118.6	15	7052	3.75	81	378	1.09	0.87
2	504	50	1	8	1	273.5	0		2	3.38	3.23	99.3	23	6056	3.28	99	416	1.24	0.96
2	505	55	1	1	1	238.5	0	14	1	4.57	5.15	138.6	22	6271	5.31	96	424	0.92	0.84
2	506	50	1	1	1	199.2	0		1	6.28	4.002	129.2	17	6573	4.41	79	332	0.86	0.76
2	507	55	2	6	1	243.2	0		1	7.3	4.2	110.2	22	7202	4.37	60	200	1.01	0.74
2	508	48	1	10	1	208.7	0		1	7.4	4.41	139.4	20	6934	3.48	85	204	1.37	0.8
2	509	46	1	7	0	303.5	1		1	4.38	4.5	133	21	6313	8.46	103	395	0.8	0.81
2	510	52	2	6	1	183	1		1	3.91	4.27	121.7	32	6644	6.79	55	231	1.08	0.79
2	511	73	1	10	0	360.8	1		1	3.5	5.04	143.3	26	6586	4.18	86	357	0.73	0.95
2	512	54	2	6	0	189.9	0		1	4.58	4.09	125.3	17	8196	4.58	52	248	0.83	0.69
2	513	33	1	10	1	412.7	0	9	2	1.9	4.01	117.5	34	6244	2.98	67	427	0.93	0.84
2	514	53	2	6	0	293.5	0		2	3.14	2.8	80.1	15	5531	1.99	64	300	0.97	0.89
2	515	65	2	7	4	201.2	0		2	5.89	3.79	105.8	26	5987	3.07	67	305	0.99	0.93
2	516	73	1	1	1	231.3	0	15	2	3.6	3.885	117.4	47	5946	2.97	86	271	0.79	0.91
2	517	37	2	11	0	257.9	0		2	8.06	5.06	95.7	10	7467	3.57	52	286	1.11	0.65
2	518	71	1	1	1	185.6	0		1	4.2	4.095	122.4	15	6230	3.46	106	324	0.79	1.12
2	519	64	1	10	1	227.7	0		2	3.81	4	113.7	16	6426	6.93	117	282	1	0.92
2	520	67	1	1	1	117.8	0	0	2	12.2	4.2	115.4	38	5353	5.75	62	237	0.94	0.78
2	521	52	1	7	1	171	0		1	5.5	4.935	151.9	10	7388	5.58	109	379	1.05	0.76
2	522	29	2	1	3	255.8	0	14	1	4.08	4.34	123.1	19	8154	5.11	81	412	0.92	0.85
2	523	60	1	8	1	72.12	0	0	1	5.5	4.515	131.2	29	7073	4.31	91	495	1.35	0.81
2	524	72	1	7	3	205.4	0	13	2	3.5	3.675	108.9	12	4576	4.75	80	268	0.78	0.76
2	526	56	1	8	0	304	0	18	1	4.2	4.97	145.3	26	8868	6.67	82	395	0.76	0.68
2	527	67	1	8	1	257.4	0	1	1	3.73	4.81	134.2	25	7993	7.93	89	377	1	0.76
2	528	61	2	6	1	173.9	1	2	2	10.08	3.76	104.7	22	5550	2	51	237	0.42	0.65
2	529	49	2	10	0	188.2	1	9	1	7.02	3.93	120.2	23	7319	3.53	68	258	1.13	0.78
2	530	61	1	1	1	324.2	0		1	4.9	3.99	122.9	12	5994	5.08	81	364	0.92	0.85
2	531	63	2	6	0	293	1		1	6.7	3.6	118.5	20	7323	4.89	53	257	1.06	0.73
2	532	54	2	8	0	261.1	1		1	4.81	4.65	124.8	25	6978	2.66	67	158	1.07	0.67
2	533	50	2	7	0	62.08	0	22	1	3.87	4.09	112.4	13	7080	2.06	52	178	1.11	0.71
2	534	65	2	5	1	226.3	1	1	1	4.9	5.25	142.2	23	7342	4.34	63	344	1.03	0.68
2	535	53	2	6	0	239.4	1	0	2	9.99	4.28	107.6	16	6676	3.91	60	178	1.29	0.62
2	536	47	1	10	0	146.1	0	5	2	9.5	3.885	114.3	20	4566	3.17	73	285	0.97	0.7
2	537	49	2	6	0	284.7	0		1	4.7	4.41	120.4	45	7786	4.12	73	318	1.12	0.65
2	538	40	1	1	3	310.5	0		1	4.6	5.985	123.7	23	7356	3.49	109	341	1.26	0.92
2	540	61	1	7	0	138	1		2	9.2	3.36	98.7	90	3716	3.49	60	129	0.9	0.65
2	541	71	1	8	1	331.8	1		2	9	4.62	102.4	11	6311	4.77	108	259	1.16	1.03
2	542	61	1	7	0	319.3	1		1	4.2	4.305	126.4	24	5789	5.34	70	244	1.12	0.62
2	543	54	1	1	1	231.3	0	10	1	5.22	4.63	129.8	46	7244	6.14	93	339	1.14	0.9
2	544	61	1	8	1	434.9	0		1	3.17	3.938	123.7	17	7099	5.26	115	400	1.19	1.1
2	545	41	2	6	0	263.9	1		1	3	4.3	117.7	41	7759	6.1	64	397	1.09	0.79
2	546	75	1	10	1	210.5	0
2	547	71	1	10	1	282.7	0		1	5	4.305	136.3	10	6753	5.67	84	386	0.99	0.89
2	548	43	2	6	1	204.9	1		2	5.35	3.03	83.1	28	4463	1.47	67	307	1.4	0.79
2	549	61	1	10	1	231.9	0	9	1	3.9	4.305	136.8	21	6930	2.85	98	368	0.96	1
2	550	56	1	8	0	181.7	0		2	9.9	3.78	95.5	15	7424	6.57	87	521	1.49	0.98
2	551	44	1	1	0	210	0	2	1	7.4	4.22	124.2	36	5214	1.66	79	294	1.48	0.94
2	552	47	2	6	0	375.1	0	7	1	8.7	4.6	114.7	30	7390	2.98	79	322	1.07	0.77
2	553	62	1	8	0	122.4	0		2	2.4	3.27	112.7	14	8312	6.03	83	379	1.29	0.88
